# Supplementary material for: Synthesis of a metal–organic framework Cu-Mi-UiO-66-based fluorescent nanoprobe for the simultaneous sensing and intracellular imaging of GSH and ATP
Source: Royal Society of Chemistry journal article supplement (doi:10.1039/d4nr02585g), 2024-01-01
Supplement: d4nr02585g1.pdf [file d4nr02585g1.pdf]

## Supporting Information

# Synthesis of Metal-Organic Framework Cu-Mi-UiO-66-based Fluorescent Nanoprobe for Simultaneous Sensing and Intracellular Imaging of GSH and ATP

*Yun Liu<sup>a#</sup>, Shuqi Xia<sup>a#</sup>, Meng Xiao<sup>a</sup>, Mo Yang<sup>d</sup>, Mengsu Yang<sup>c</sup>, Changqing Yi<sup>a,b\*</sup>*

a. Key Laboratory of Sensing Technology and Biomedical Instruments (Guangdong Province), School of Biomedical Engineering, Sun Yat-Sen University, Guangzhou 510275, China

b. Research Institute of Sun Yat-Sen University in Shenzhen, Shenzhen 518057, China.

c. Department of Biomedical Sciences, City University of Hong Kong, Hong Kong SAR, China.

d. Department of Biomedical Engineering, The Hong Kong Polytechnic University, Hong Kong SAR, China.

# These authors contributed equally to this work.

---

\* Authors to whom any correspondence should be addressed.

Email: [yichq@mail.sysu.edu.cn](mailto:yichq@mail.sysu.edu.cn)

## Table of contents

|                                                    |      |
|----------------------------------------------------|------|
| Reagents and instrumentation .....                 | S-3  |
| Fig. S1 .....                                      | S-4  |
| Characterization of ligand H <sub>2</sub> L1 ..... | S-4  |
| Scheme S1.....                                     | S-5  |
| Fig. S2 .....                                      | S-5  |
| Fig. S3 .....                                      | S-6  |
| Fig. S4.....                                       | S-6  |
| Fig. S5 .....                                      | S-7  |
| Fig. S6 .....                                      | S-8  |
| Fig. S7.....                                       | S-8  |
| Fig. S8.....                                       | S-9  |
| Fig. S9.....                                       | S-9  |
| Table S1 .....                                     | S-10 |
| Table S2 .....                                     | S-10 |
| Fig. S10.....                                      | S-11 |
| Fig. S11 .....                                     | S-12 |
| Cytotoxicity Assay.....                            | S-13 |
| Fig. S12.....                                      | S-14 |
| Reference .....                                    | S-15 |

## Reagents and instrumentation

Dimethylaminoterephthalate, 1-butyl-3-methylimidazolium hexafluorophosphate ([BMIm][PF<sub>6</sub>]), dichloromethane (CH<sub>2</sub>Cl<sub>2</sub>), tetrahydrofuran (THF), ethyl alcohol, methyl alcohol (MEOH), and sodium hydroxide (NaOH) were obtained from Macklin Biochemical Co. (Shanghai, China). Maleic anhydride, copper(ii) nitrate hydrate (Cu(NO<sub>3</sub>)<sub>2</sub>·3H<sub>2</sub>O), zirconium tetrachloride (ZrCl<sub>4</sub>), N,N-dimethylformamide (DMF), glutathione (GSH), thiazolyl blue (MTT), methyl sulfoxide (DMSO), and oligomycin were obtained from Aladdin chemical Co. (Shanghai, China). Ether was purchased from Guangzhou Chemical Reagent Factory (Guangzhou, China). Adenosine triphosphate (ATP) was purchased from Solarbio Science & Technology Co. Ltd (Beijing, China). Dulbecco's Modified Eagle Medium (DMEM), fetal bovine serum (FBS), trypsin and penicillin-streptomycin (double antibody) were obtained from Gibco BRL (Grand Island, New York, USA). Cell lysis buffer (RIPA) was purchased from Biosharp (Hefei, China). SYTO Green was purchased from KeyGEN Bio-Tech Co., Ltd (Nanjing, China). N-Ethylmaleimide (NEM) was purchased from OKY Bio-Tech Co. (Beijing, China).  $\alpha$ -lipoic acid (ALA) and etoposide were purchased from Acme Biochemical Co., Ltd (Shanghai, China). The ATP aptamer modified with fluorescent dye Cy5 (5'-Cy5-ACCTGGGGGAGTATTGCGGAGGAAGGT-3') was purchased from Sangon Biotech Co., Ltd (Shanghai, China). Commercial GSH and ATP standard testing kits were purchased from Boxbio Technology Co. (Beijing, China). Deionized (DI) water was obtained from a Millipore water purification system.

The nuclear magnetic resonance hydrogen spectrum (<sup>1</sup>HNMR) was measured using an AVANCE IIIIT 600HD 600 MHz spectrometer (Bruker BioSpin, Switzerland). The hydrodynamic diameters and zeta potential were determined using a MS2000 Zetasizer Nano-ZS90 (Malvern, UK). Transmission electron microscopy (TEM) images were obtained using a JEM-1400 electron microscope (JEOL, Japan), and scanning electron microscopy (SEM) images were obtained using a Sigma 300 electron microscope (Carl Zeiss, Germany). The porosity was measured by an APSP 2460 aperture analyzer (Micromeritics, USA). The ultraviolet-visible (UV-vis) absorption spectra were measured on a DU-730 ultraviolet/visible spectrophotometer (Beckman, USA). X-ray

diffraction (XRD) patterns were acquired on an Empyrean XRD system (PANalytical, Netherlands). X-ray photoelectron spectroscopy (XPS) patterns were acquired on an ESCALAB 250 X-ray photoelectron spectrometer (THERMOP-VG scientific, USA). Fluorescence spectra were measured on a Spectrofluorometer FS5 (Edinburgh, Scotland). Confocal microscope images were observed using a confocal laser scanning microscope TCS SP5 (Leica, Germany).

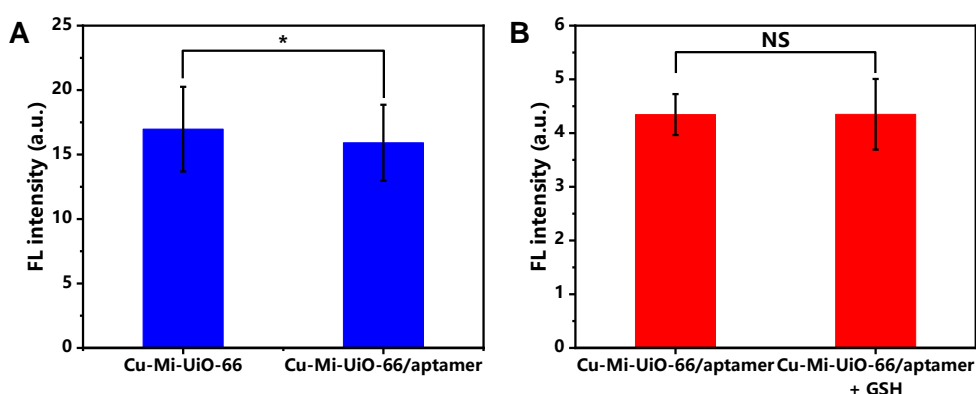

**Fig. S1.** (A) Fluorescence intensity at 455 nm of Cu-Mi-UiO-66 and Cu-Mi-UiO-66/apptamer, (B) Fluorescence intensity at 670 nm of Cu-Mi-UiO-66/apptamer without or with GSH (Paired sample *t* test; NS: no significant difference,  $p > 0.05$ ; \*:  $0.05 < p < 0.01$ ; \*\*:  $p < 0.01$ ).

### Synthesis and characterization of ligand H<sub>2</sub>L1

The synthesis of maleimide functional ligand H<sub>2</sub>L1 was characterized by <sup>1</sup>HNMR and mass spectrometry (MS). First of all, as shown in Fig. S2A, the proton peaks at 3.77 ppm and 3.91 ppm were attributed to 6 methyl H on the ester groups at both ends of the intermediate ester, while the proton peak at 7.27 ppm was attributed to two H on the maleimide groups, confirming the successful synthesis of the intermediate ester. In Fig. S2B, the proton peak of methyl hydrogen at 3 ~ 4 ppm disappeared, and a carboxyl H peak after ester hydrolysis appeared at 11.27 ppm, indicating the successful synthesis



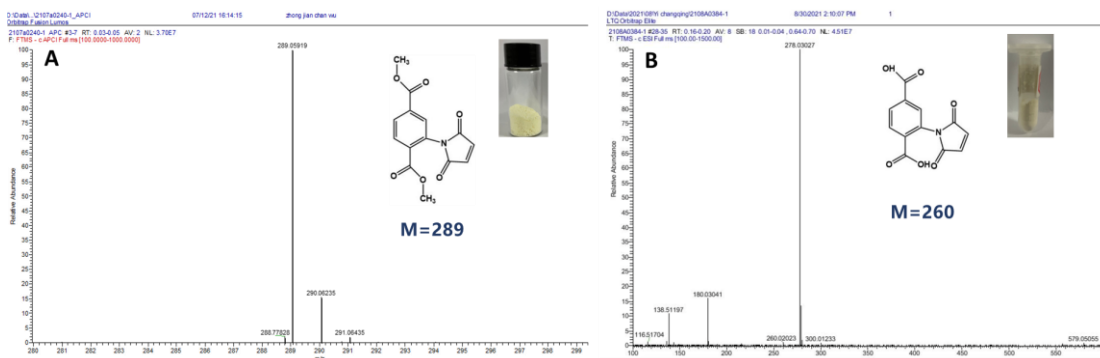

**Fig. S3.** MS spectra of the intermediate ester (A) and the final product H<sub>2</sub>L1 ligand (B).

### Synthesis and characterization of NMOF-based nanoprobe

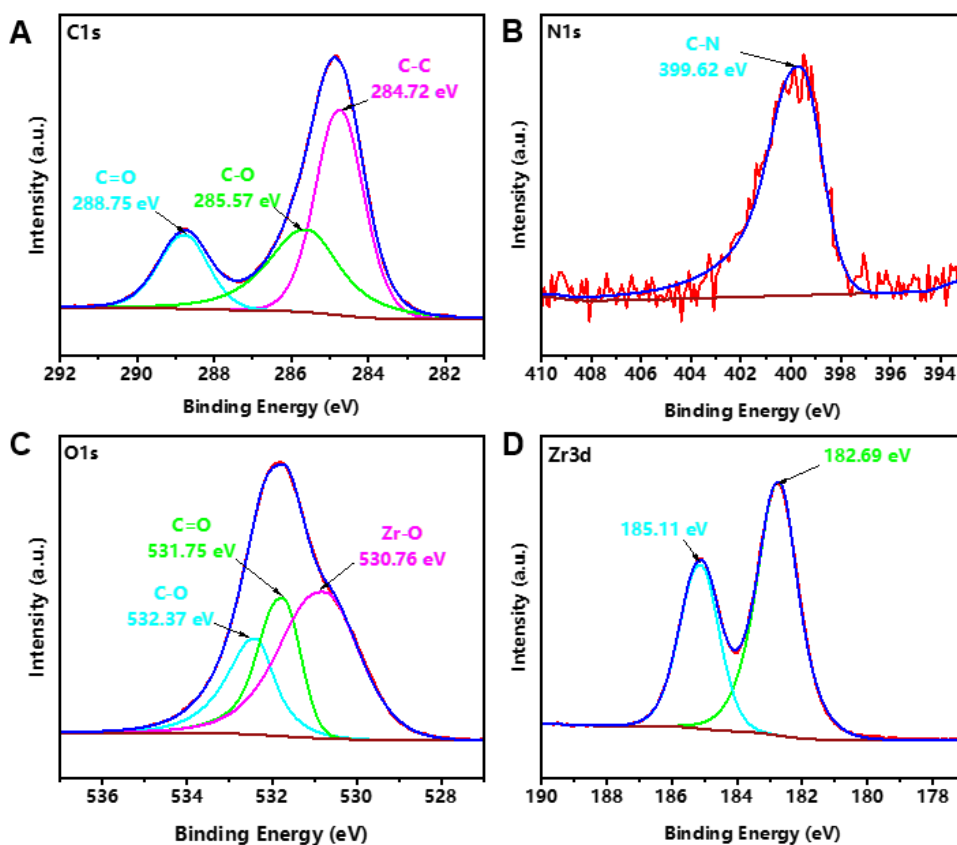

**Fig. S4.** Peak-differentiation-imitating analysis C1s (A), N1s (B), O1s (C) and Zr3d (D) of the deconvoluted XPS spectra of Mi-UiO-66.

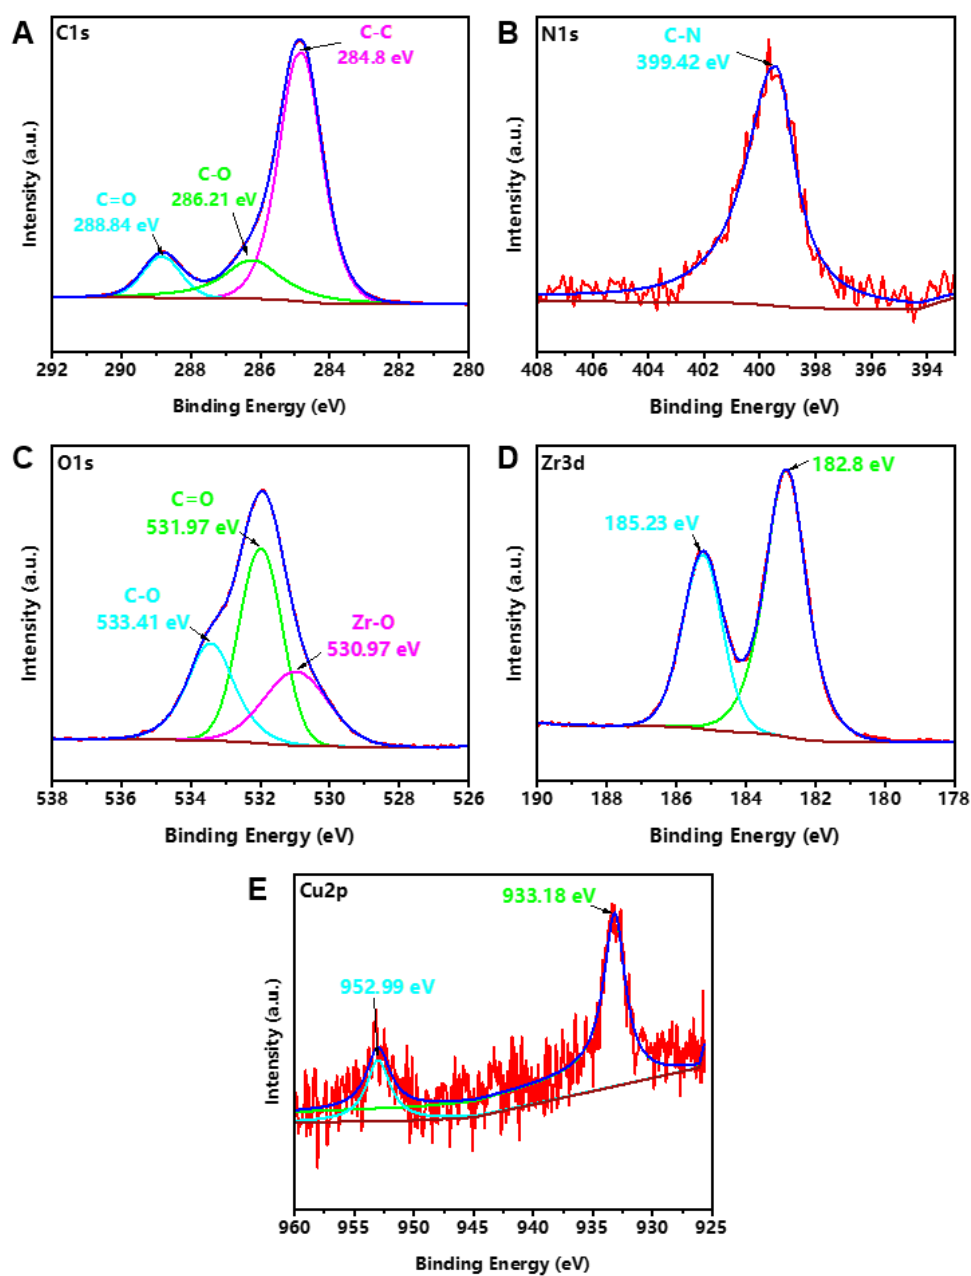

**Fig. S5.** Peak-differentiation-imitating analysis C1s (A), N1s (B), O1s (C), Zr3d (D) and Cu2p (E) of the deconvoluted XPS spectra of Cu-Mi-UiO-66.

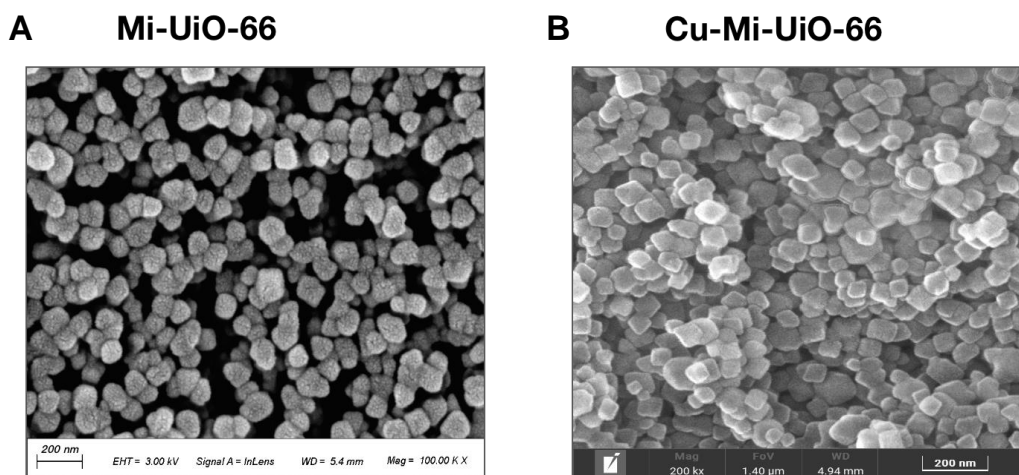

**Fig. S6.** SEM images of Mi-UiO-66 (A) and Cu-Mi-UiO-66 (B).

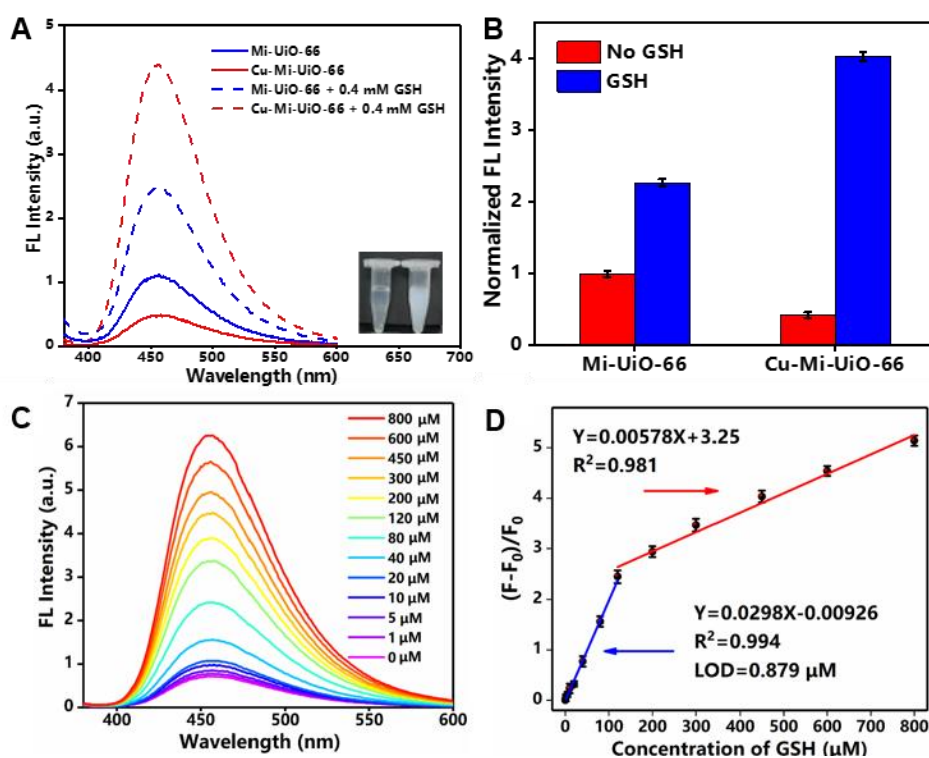

**Fig. S7.** (A-B) Fluorescence spectra (A) and fluorescence intensity at 455 nm (B) of Mi-UiO-66 and Cu-Mi-UiO-66 in the absence and presence of 0.4 mM GSH. (C) Fluorescence spectra of Cu-Mi-UiO-66 with different concentrations of GSH (0 - 800 μM). (D) Linear relationship between  $\Delta F_{455}$  and GSH concentrations.



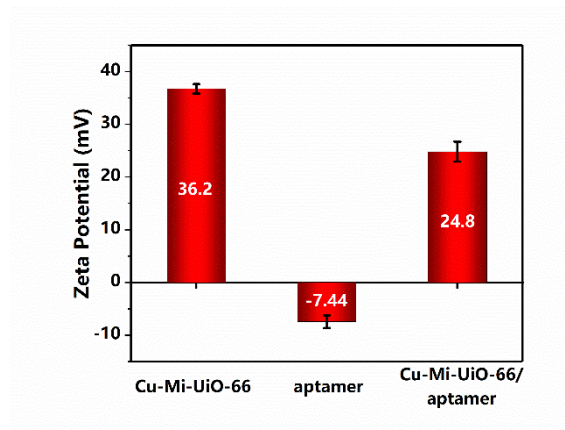

**Fig. S8.** Zeta potential of Cu-Mi-UiO-66, aptamer and Cu-Mi-UiO-66/apptamer.

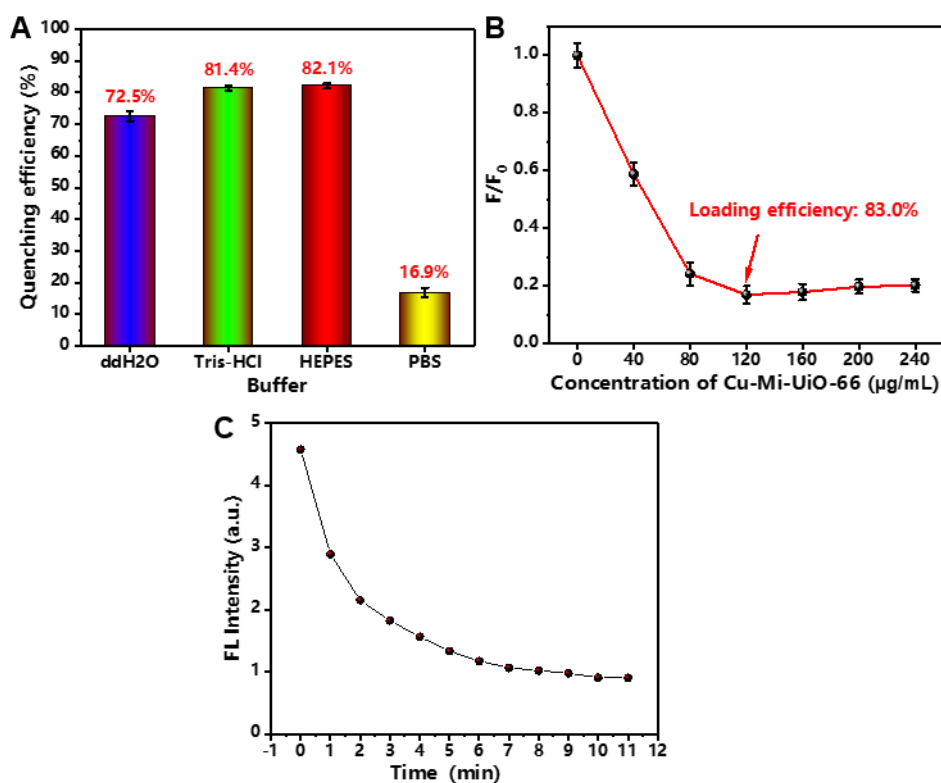

**Fig. S9.** (A) Decrease in fluorescence intensity ( $\lambda_{em} = 670$  nm) of solution containing 100 nM Cy5-labeled aptamer after being reacted with Cu-Mi-UiO-66 in different buffer solutions. (B) Decrease in fluorescence intensity ( $\lambda_{em} = 670$  nm) of solution containing 100 nM Cy5-labeled aptamer after being reacted with different concentrations of Cu-Mi-UiO-66. (C) Time-dependent fluorescence intensity changes of solution containing 100 nM Cy5-labeled aptamer after being reacted with 120  $\mu\text{g/mL}$  Cu-Mi-UiO-66 in HEPES buffer.

**Table S1. Comparison of different methods for the determination of GSH**

| <b>Target</b> | <b>Detection method</b> | <b>Linear range (<math>\mu\text{M}</math>)</b> | <b>LOD (<math>\mu\text{M}</math>)</b> | <b>Reference</b> |
|---------------|-------------------------|------------------------------------------------|---------------------------------------|------------------|
|               | FL                      | 5-450                                          | 2.17                                  | This work        |
|               | EC                      | 0.1-5                                          | 0.133                                 | 1                |
|               | FL                      | 0.01-6                                         | 0.0015                                | 2                |
| GSH           | Colorimetric            | 0.02-3, 3-50                                   | 0.02                                  | 3                |
|               | Colorimetric            | 10-400                                         | 1.88                                  | 4                |
|               | Colorimetric            | 5-100                                          | 0.33                                  | 5                |
|               | PL                      | 10-50, 50-200                                  | 0.62                                  | 5                |

Note: FL, fluorescence; EC, electrochemical; PL, persistent luminescence.

**Table S2. Comparison of different methods for the determination of ATP**

| <b>Target</b> | <b>Detection method</b> | <b>Linear range (<math>\mu\text{M}</math>)</b> | <b>LOD (<math>\mu\text{M}</math>)</b> | <b>Reference</b> |
|---------------|-------------------------|------------------------------------------------|---------------------------------------|------------------|
|               | FL                      | 1-50, 50-800                                   | 0.635                                 | This work        |
|               | FL                      | 10-200                                         | 4.24                                  | 6                |
|               | CL                      | 2-2000                                         | 0.0843                                | 7                |
| ATP           | FL                      | 9000-24000                                     | 3                                     | 8                |
|               | FL                      | 0.78-50                                        | 4.75                                  | 9                |
|               | FL                      | 0-200                                          | 0.55                                  | 10               |
|               | FL                      | 1-200                                          | 0.4                                   | 11               |

Note: CL, chemiluminescence.

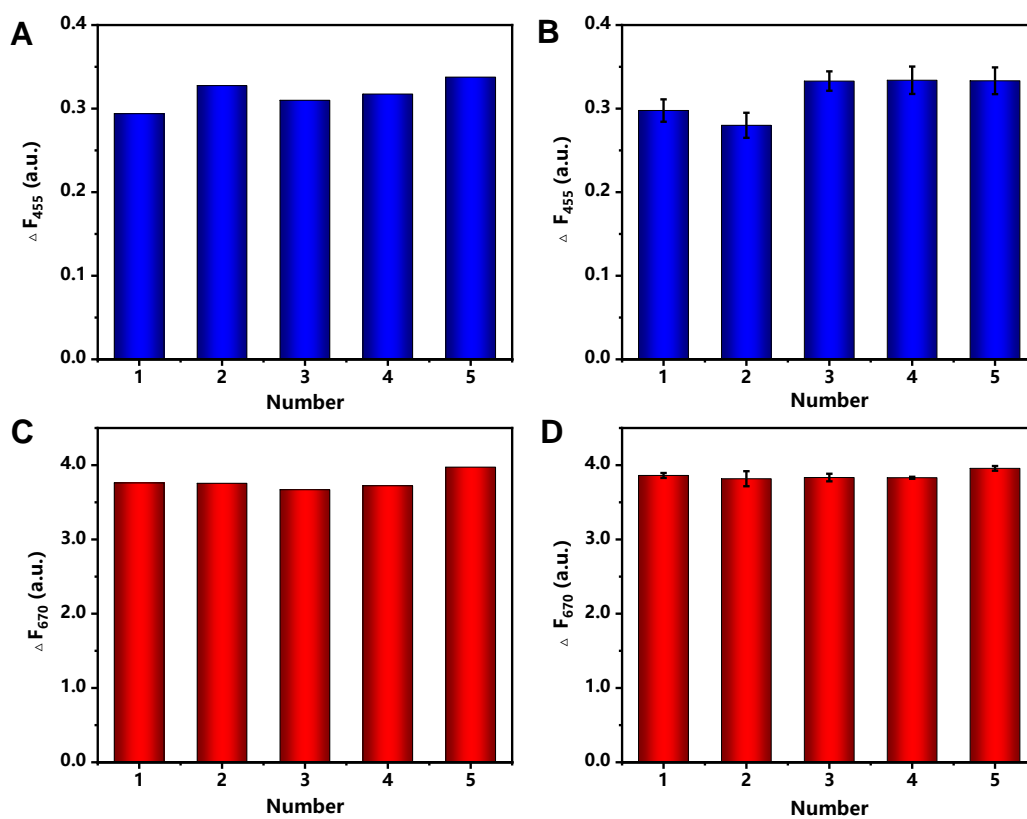

**Fig. S10.** (A, B) Intra-assay (A) and inter-assay (B) results for the determination of GSH using Cu-Mi-UiO-66/aptamer. (C, D) Intra-assay (C) and inter-assay (D) results for the determination of ATP using Cu-Mi-UiO-66/aptamer.

## Quantitation of GSH and ATP in cell lysate

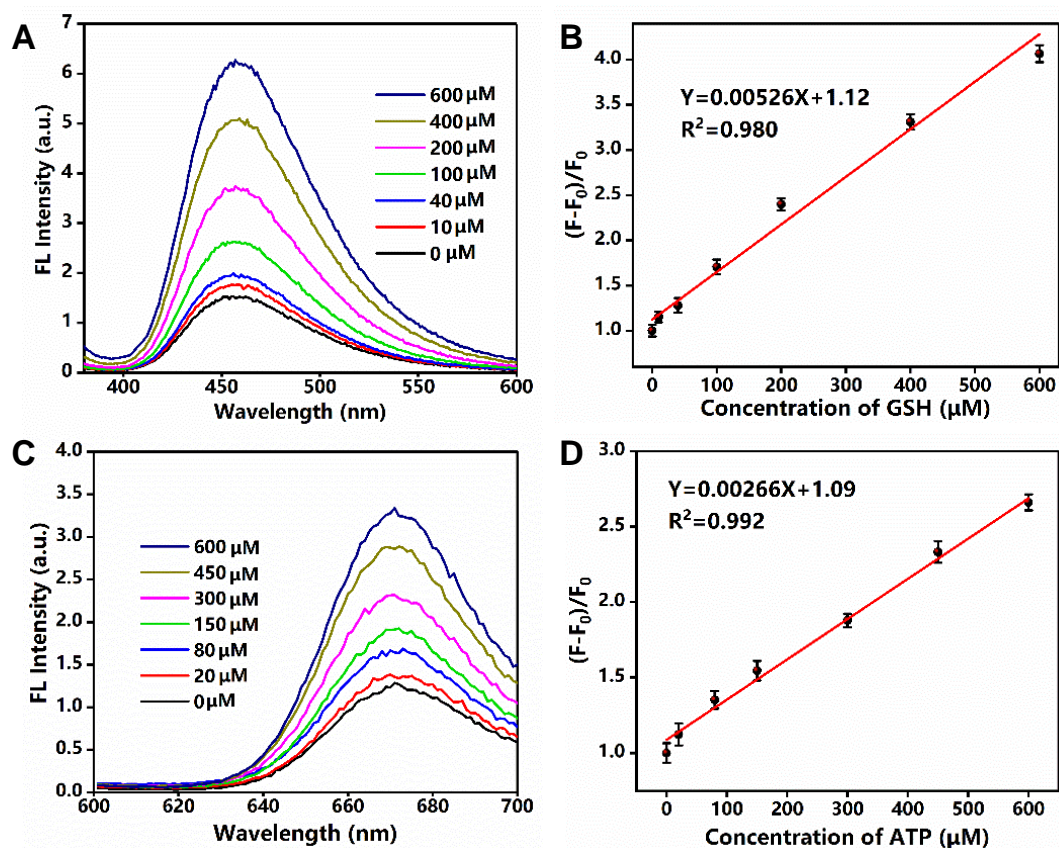

**Fig. S11.** The fluorescence spectra of Cu-Mi-MOF/apptamer in response to different concentrations of GSH (A) and ATP (C) in cell lysate. Linear plots of fluorescence quenching efficiency ( $\Delta F_{455}$  (B) or  $\Delta F_{670}$  (D)) of Cu-MOFs/apptamer as a function of the GSH concentration (B) and the ATP concentration (D).

### **Fluorescence imaging of intracellular GSH and ATP**

*Cytotoxicity Assay.* Once the cells had reached a suitable confluency, they were seeded into 96-well plates at a density of  $5 \times 10^3$  cells/well. The outermost wells were filled with 100  $\mu$ L of PBS to prevent liquid evaporation. The plates were then incubated overnight to allow the cells to adhere to the wells. FBS-free DMEM medium was used to prepare different concentrations of Mi-UiO-66, Cu-Mi-UiO-66, and Cu-Mi-UiO-66/aptamer solutions (0, 40, 80, 120, 160, 200, 250, 300  $\mu$ g/mL, 100  $\mu$ L), which were added to the wells to replace the original culture medium. The plates were then incubated for another 24 h. Afterward, the plates were rinsed, and 100  $\mu$ L of medium and 20  $\mu$ L of MTT-PBS solution (5 mg/mL) were added to each well. The plates were further incubated for 4 h before being rinsed again. Finally, 150  $\mu$ L DMSO was added to each culture well and shaken at a low speed and away from light for 15 min to promote complete dissolution of the blue-purple formazan crystals. The absorbance (A) of each well in the 96-well plate was measured at 570 nm using a multifunctional enzyme marker. The cytocompatibility of the control group (without fluorescence probe) was set to 100 %, and only the wells containing PBS were included as the blank group. The formula for calculating the cell survival rate is as follows:

$$cell\ survival\ rate = \frac{A_{experimental} - A_{blank}}{A_{control} - A_{blank}} \times 100\ %$$

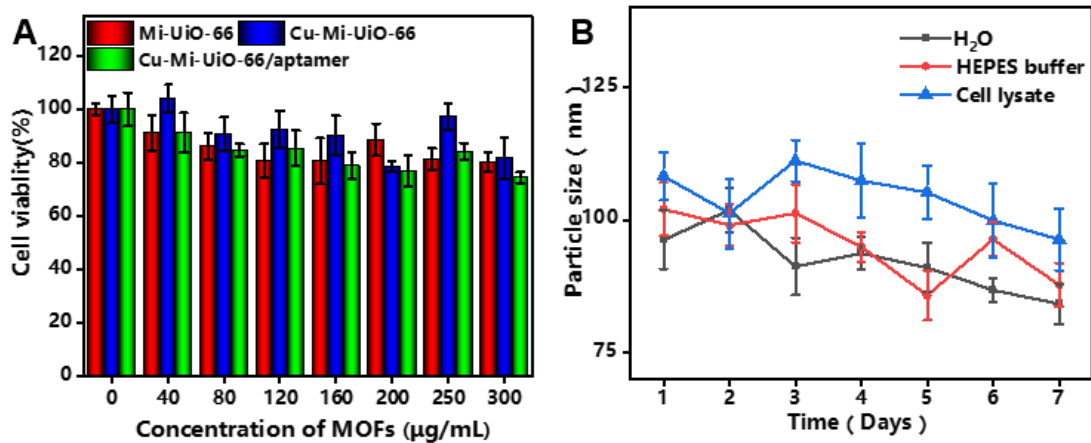

**Fig. S12.** (A) Viability of HepG2 cells upon treatment with Mi-UiO-66, Cu-Mi-UiO-66 and Cu-Mi-UiO-66/apptamer for 24 h. (B) Particle size of Cu-Mi-UiO-66/apptamer in ddH<sub>2</sub>O, HEPES buffer and cell lysate as a function of storage days.

## References

1. S. M. Lee, H. Kim, P. Li and H. G. Park, *Biosens. Bioelectron.*, 2024, **250**, 116019.
2. L. Yang, N. Jiang, Z. Zhang, X. Zhang, H. Wu, Z. Li and Z. Zhou, *Talanta*, 2024, **270**, 125652.
3. T. Zhang, N. Lu, M. Zhang, R. Zhang, H. Jiang, C. Wang and D. Xing, *ACS Appl. Nano Mater.*, 2024, **7**, 756-765.
4. X. Cheng, X. Zhou, Z. Zheng and Q. Kuang, *Chem. Eng. J.*, 2022, **430**, 133079.
5. X. Chen, H. Zhang, X. Liang and L. Li, *Sens. Actuat. B Chem.*, 2024, **403**, 135200.
6. X. Shi, H. Xu, Y. Wu, Y. Zhao, H. Meng, Z. Li and L. Qu, *J. Anal. Test.*, 2021, **5**, 165-173.
7. H. Chen, Y. Feng, F. Liu, C. Tan, N. Xu, Y. Jiang and Y. Tan, *Biosens. Bioelectron.*, 2024, **247**, 134249.
8. Y. Li, Z. Meng, Y. Liu and B. Zhang, *RSC Adv.*, 2024, **14**, 5594-5599.
9. Y. Xiong, J. Zhang, Z. Yang, Q. Mou, Y. Ma, Y. Xiong and Y. Lu, *J. Am. Chem. Soc.*, 2020, **142**, 207-213.
10. L. Kaisu, Y. Songlin, S. Wu, Z. Ying, L. Wang, A. Potapov, X. Yu, Y. Sun, N. Sun and M. Zhu, *ACS Appl. Mater. Inter.*, 2024, **16**, 5129-5137.
11. L. Peng, J. Zhou, G. Liu, L. Yin, S. Ren, S. Man and L. Ma, *Sens. Actuat. B Chem.*, 2020, **320**, 128164.
